# Supplementary material
Source: PubMed Central journal article supplement (PMC5338653)
Supplement: supp_pp.16.01038_PP2016-01038R3_Supplemental_Figure_S1.pdf [file supp_pp.16.01038_PP2016-01038R3_Supplemental_Figure_S1.pdf]

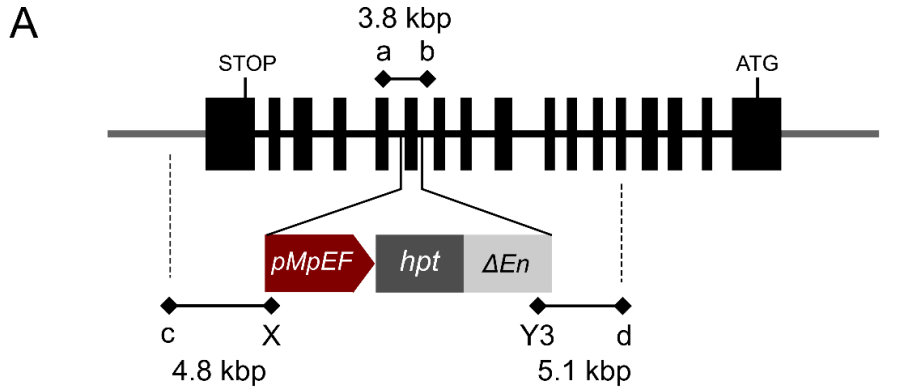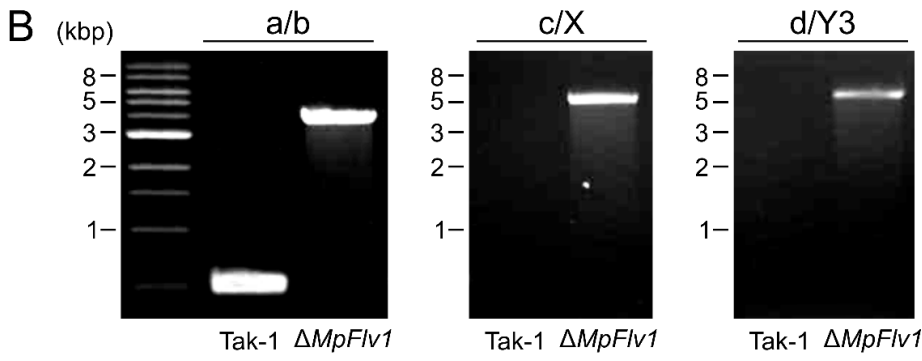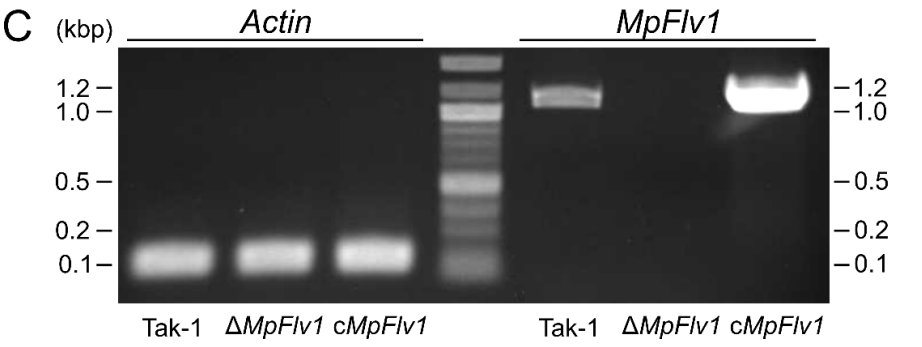

**Fig. S1.** Strategy for targeted disruption of the *MpFlv1* locus and analysis of homologous recombination events. (A) Schematic diagram of targeted disruption of the *MpFlv1* locus through homologous recombination. (B) Genotyping of the  $\Delta MpFlv1$  lines. The positions of the primers used for PCR analysis are shown in Fig. S1A. (C) Reverse transcript-PCR of *MpFlv1* in Tak-1,  $\Delta MpFlv1$ , and *cMpFlv1*.
