# Supplementary material
Source: PubMed Central journal article supplement (PMC5338653)

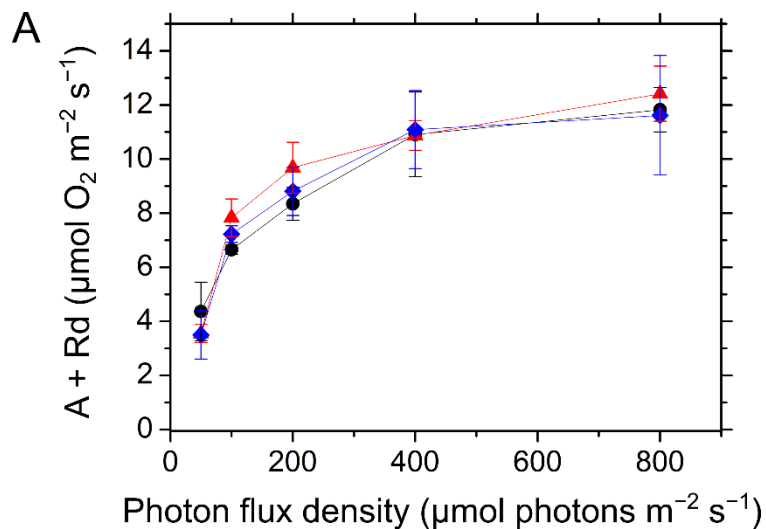

**Fig. S3.** Dependence of gross photosynthetic  $\text{O}_2$ -evolution rates (A) and  $Y(\text{II})$  (B) on photon flux density at steady-state photosynthesis in Tak-1 (black circles),  $\Delta MpFlv1$  (red triangles), and  $cMpFlv1$  (blue diamonds).  $\text{CO}_2$ -saturated conditions were generated by adding 1 M  $\text{NaHCO}_3$  to the felt mat in the reaction chamber. Data are represented as the mean  $\pm$  SD of three independent measurements.

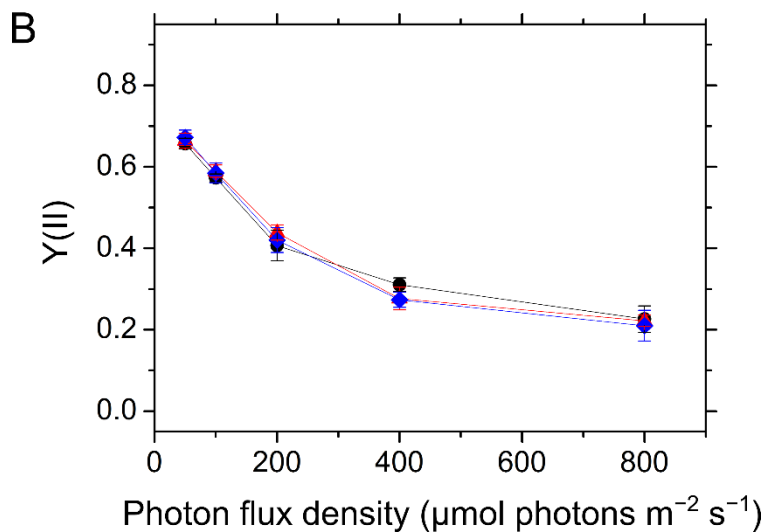

Supplement: supp_pp.16.01038_PP2016-01038R3_Supplemental_Figure_S3.pdf [file supp_pp.16.01038_PP2016-01038R3_Supplemental_Figure_S3.pdf]
