# Supplementary material
Source: PubMed Central journal article supplement (PMC5338653)

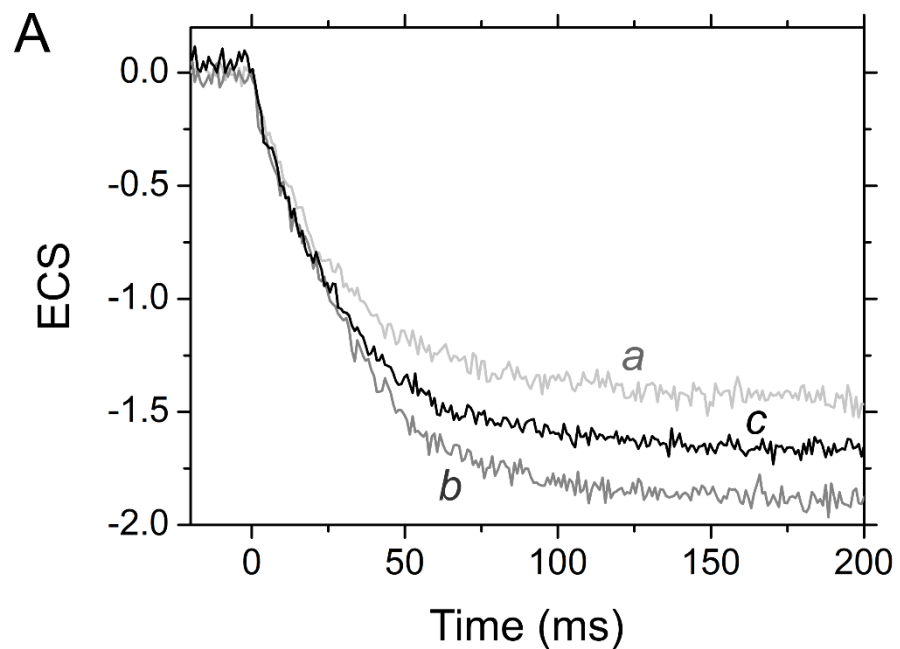

**Fig. S4.** The representative original traces of dark-interval relaxation kinetics of ECS in Tak-1 (A) and  $\Delta MpFlv1$  (B) during the experiment shown in Supplemental Fig. S5. The shown traces were obtained during the transition to high light at  $-0.5$ ,  $0.5$ , and  $4.5$  min on the  $x$ -axis in Supplemental Fig. S5 (*a*, *b*, and *c* respectively). Line colors become darker over time. Actinic light was turned off at time zero.

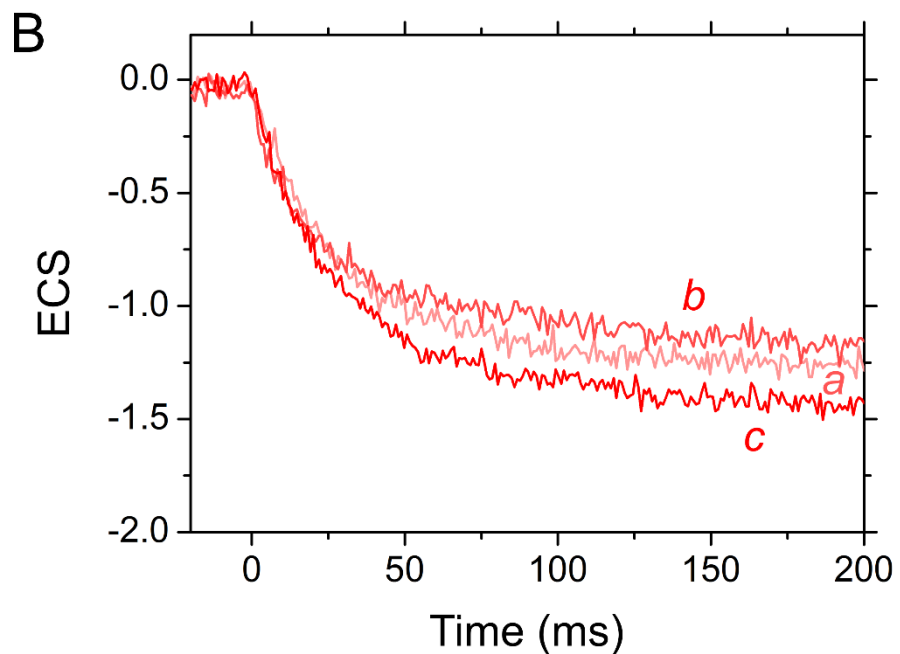

Supplement: supp_pp.16.01038_PP2016-01038R3_Supplemental_Figure_S4.pdf [file supp_pp.16.01038_PP2016-01038R3_Supplemental_Figure_S4.pdf]
