# Supplementary material
Source: PubMed Central journal article supplement (PMC5338653)
Supplement: supp_pp.16.01038_PP2016-01038R3_Supplemental_Figure_S5.pdf [file supp_pp.16.01038_PP2016-01038R3_Supplemental_Figure_S5.pdf]

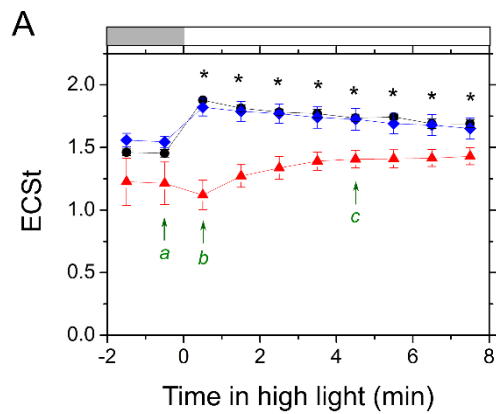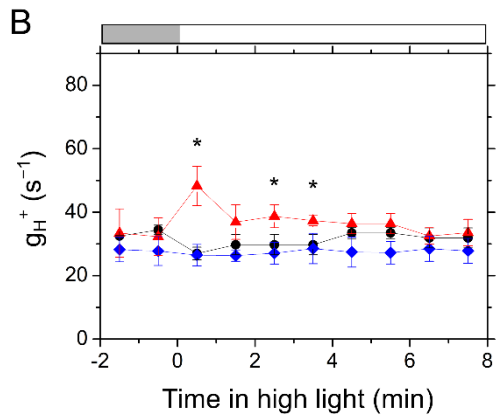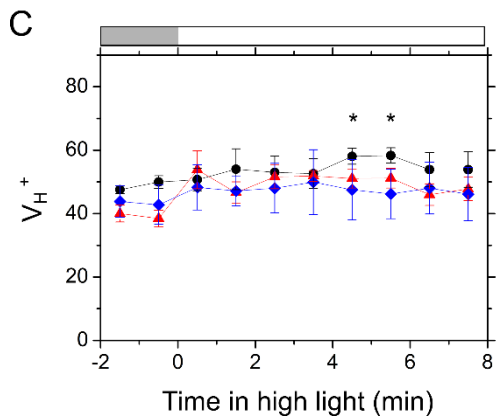

**Fig. S5.** Time courses of ECSt (A),  $g_H^+$  (B), and  $V_H^+$  (C) in the transition from moderate (180  $\mu\text{mol photons m}^{-2} \text{s}^{-1}$ , light grey bars) to high (760  $\mu\text{mol photons m}^{-2} \text{s}^{-1}$ , white bars) light in Tak-1 (black circles),  $\Delta MpFlv1$  (red triangles), and  $cMpFlv1$  (blue diamonds). Measurements were taken under ambient air. Data are represented as the mean  $\pm$  SD of three independent measurements. Differences between Tak-1 and  $\Delta MpFlv1$  were analyzed using the Student's  $t$ -test. Asterisks indicate statistically significant differences between Tak-1 and  $\Delta MpFlv1$  at  $p < 0.05$ . The original traces of the ECS signal at  $a$ ,  $b$ , and  $c$  (indicated by green arrows) are shown in Supplemental Fig. S4.
