# Supplementary material
Source: PubMed Central journal article supplement (PMC5338653)
Supplement: supp_pp.16.01038_PP2016-01038R3_Supplemental_Figure_S7.pdf [file supp_pp.16.01038_PP2016-01038R3_Supplemental_Figure_S7.pdf]

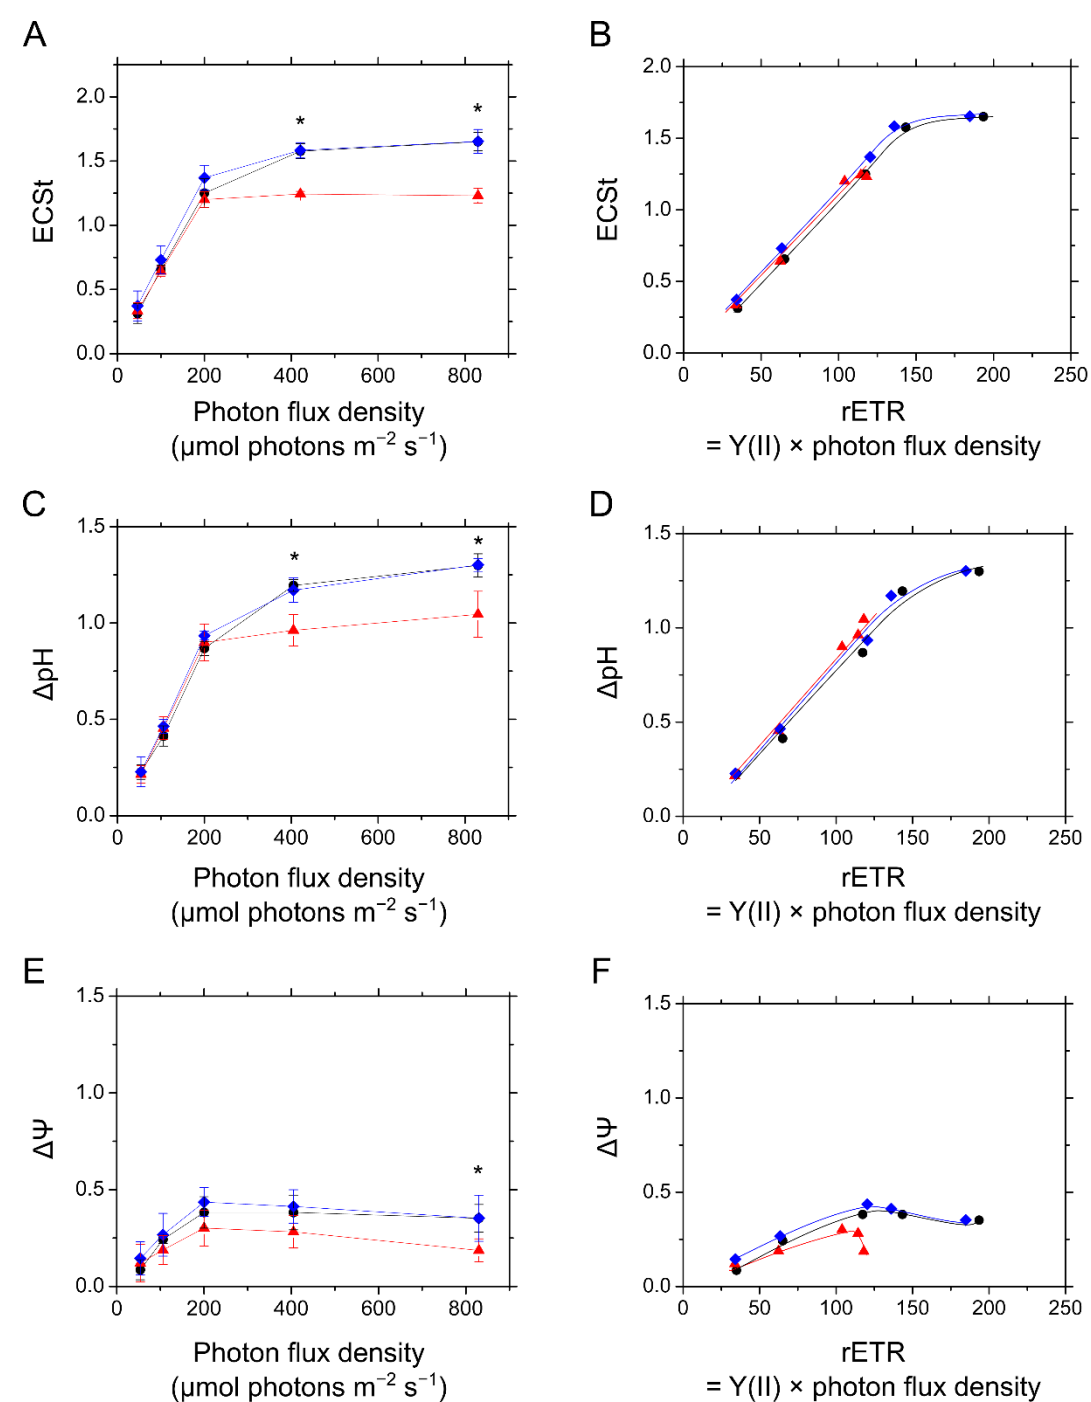

**Fig. S7.** Dependence of ECSt (A),  $\Delta\text{pH}$  (C), and  $\Delta\Psi$  (E) on photon flux density and the relationship of ECSt (B),  $\Delta\text{pH}$  (D), and  $\Delta\Psi$  (F) to rETR at steady-state photosynthesis in Tak-1 (black circles),  $\Delta MpFlv1$  (red triangles), and  $cMpFlv1$  (blue diamonds). Measurements were taken in ambient air. Calculation of the rETR was conducted using the data of Fig. 4A. Respective ECS parameters were plotted on the rETR at approximately the same photon flux densities. Data are represented as the mean  $\pm$  SD of three independent measurements. Differences between Tak-1 and  $\Delta MpFlv1$  were analyzed using Student's *t*-test. Asterisks indicate statistically significant differences between Tak-1 and  $\Delta MpFlv1$  at  $p < 0.05$ .
