# Supplementary material
Source: PubMed Central journal article supplement (PMC5338653)
Supplement: supp_pp.16.01038_PP2016-01038R3_Supplemental_Figure_S8.pdf [file supp_pp.16.01038_PP2016-01038R3_Supplemental_Figure_S8.pdf]

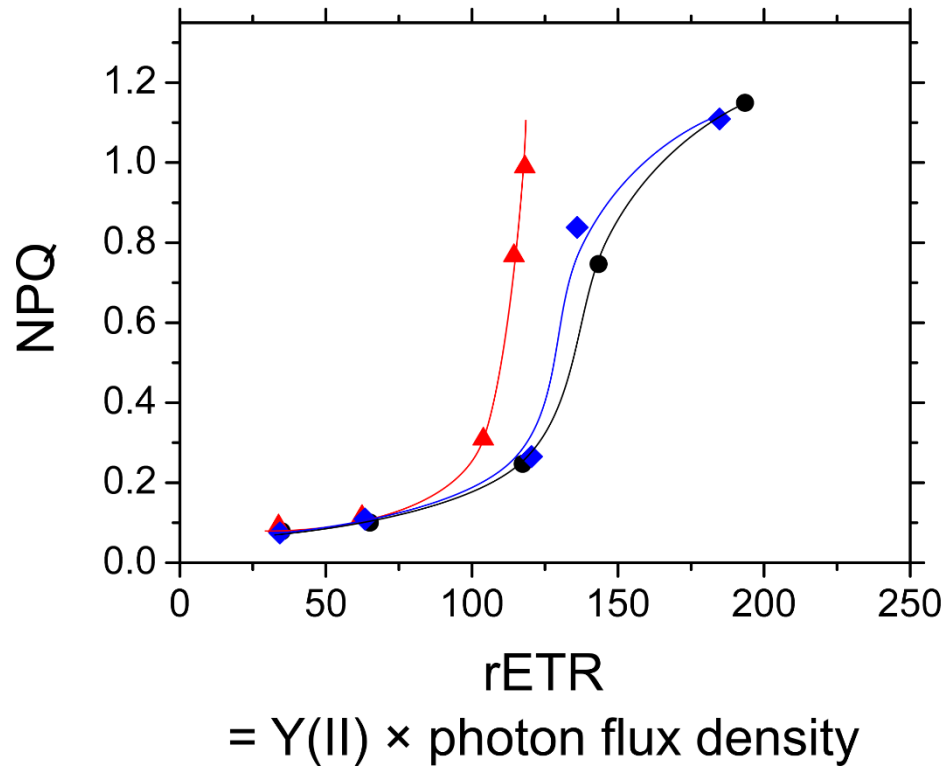

**Fig. S8.** Relationship of NPQ to rETR at steady-state photosynthesis in Tak-1 (black circles),  $\Delta MpFlv1$  (red triangles), and  $cMpFlv1$  (blue diamonds). Measurements were taken in ambient air. Calculation of rETR was conducted using the data from Fig. 4A. NPQ from Fig. 4B was plotted on rETR at the same photon flux densities. Data are represented as the mean  $\pm$  SD of three independent measurements.
