# Supplementary material
Source: PubMed Central journal article supplement (PMC5338653)
Supplement: supp_pp.16.01038_PP2016-01038R3_Supplemental_Table_S1.pdf [file supp_pp.16.01038_PP2016-01038R3_Supplemental_Table_S1.pdf]

**Supplemental Table S1.** Primers used in this study

| Name                | Sequences (5'–3')                             |
|---------------------|-----------------------------------------------|
| T <sub>up</sub> F   | CTAAGGTAGCGATTATCAAAAGATGCATAGTACAACAAAAGCAGA |
| T <sub>up</sub> R   | GCCCCGGGCAAGCTTAGATCAAGGGTTTCGGGTTCTCG        |
| T <sub>dn</sub> F   | TAAACTAGTGGCGCGGGCCTGCAGAGGCAGAAAAGAC         |
| T <sub>dn</sub> R   | TTATCCCTAGGCGCGATGTGCAACAACGGGGGAAAGT         |
| a                   | GGCGTAAACCTGCCTCCTTCA                         |
| b                   | TGAGACGTACCACCTGCCAAGC                        |
| c                   | CAAAAAGTCAATGAACTGTCTGCAATCAA                 |
| d                   | CGGGCGATGTGCTTGATCTT                          |
| C F                 | CACCATGATGGCCCTTACGATGCC                      |
| C R                 | GTAGCGTGCTCCTGTCTTCC                          |
| RT <sub>FLV</sub> F | GAATCACTCCCAAGGCGTTC                          |
| RT <sub>FLV</sub> R | GAGGACGCTGTATGGACAGGC                         |
| RT <sub>ACT</sub> F | GAGCGCGGTTACTCTTTCAC                          |
| RT <sub>ACT</sub> R | GACCGTCAGGAAGCTCGTAG                          |
| X                   | GAAGGCTTCTGATTGAAGTTTCCTTTTCTG                |
| Y3                  | TGGATTTGAACTTCTTTCGTATGGA                     |
